# Supplementary material for: Gene expression profiling in gills of the great spider crab Hyas araneus in response to ocean acidification and warming
Source: PubMed Central journal article supplement (PMC4176836; doi:10.1186/1471-2164-15-789), 2014-09-12

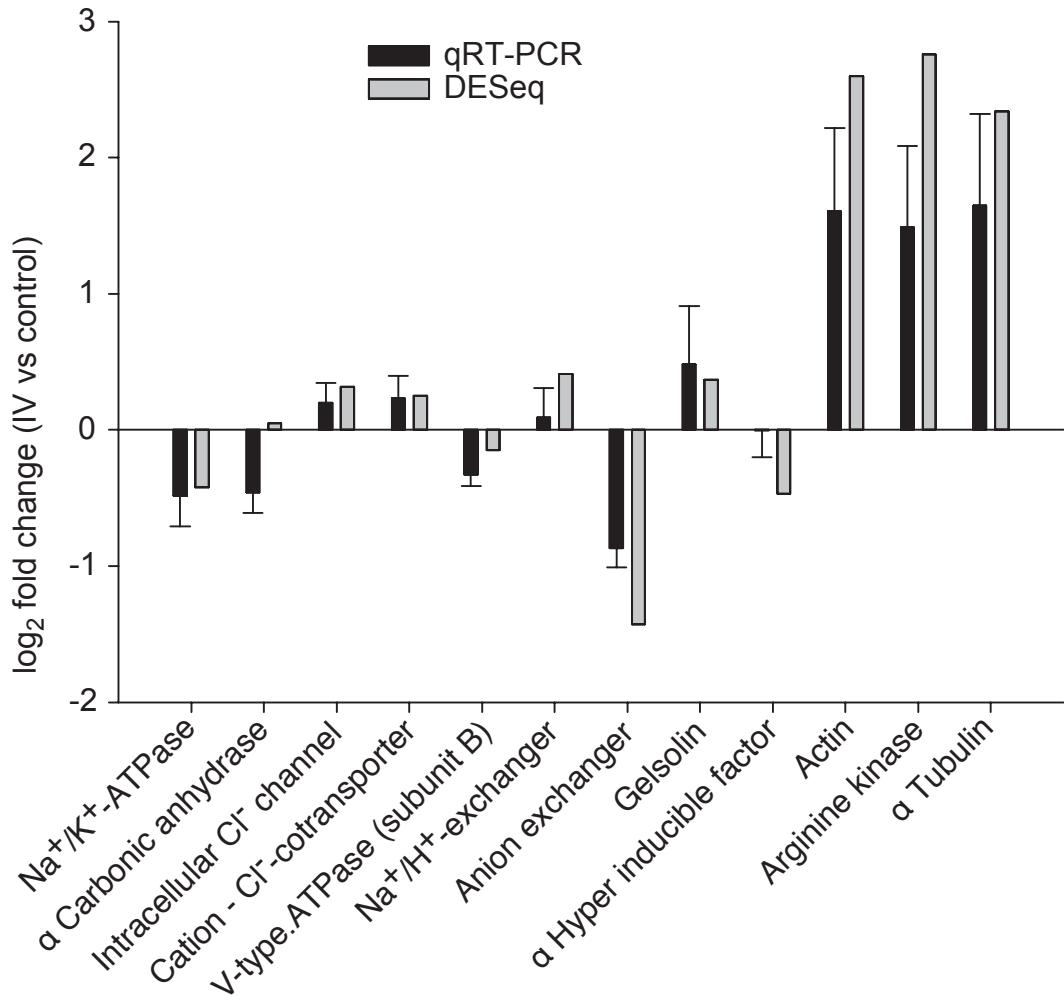

Supplement: 12864_2014_6468_MOESM3_ESM.pdf [file 12864_2014_6468_MOESM3_ESM.pdf]
